# Supplementary material for: Gestational Dysfunction-Driven Diets and Probiotic Supplementation Correlate with the Profile of Allergen-Specific Antibodies in the Serum of Allergy Sufferers
Source: PubMed Central journal article supplement (PMC7468854; doi:10.3390/nu12082381), 2020-08-09
Supplement: nutrients-12-02381-s001.pdf [file nutrients-12-02381-s001.pdf]

**Appendix A1-EuroPrevall Survey on the course of allergies**

**Case-Control Questionnaire**

1. Age: ..... years

2. Sex: M/F

**FOOD ALLERGY**

3. Does the eating any of the following foods causes health problems? If the avoidance of any of them is in progress please put the cross in proper column. If not please provide an approximately how often following foods has been eaten

**Table S1 Case-Control Questionnaire**

| FOOD                        | Does the eating any of the following foods causes health problems? |    | Avoidance (If yes) | How often the following food has been eaten |            |             |       |
|-----------------------------|--------------------------------------------------------------------|----|--------------------|---------------------------------------------|------------|-------------|-------|
|                             | Yes                                                                | No |                    | Tick one column only                        |            |             |       |
|                             |                                                                    |    |                    | Most days                                   | Most weeks | Most months | Never |
| Cow's milk*                 |                                                                    |    |                    |                                             |            |             |       |
| Hen's eggs                  |                                                                    |    |                    |                                             |            |             |       |
| Fish                        |                                                                    |    |                    |                                             |            |             |       |
| Shrimp, seafood             |                                                                    |    |                    |                                             |            |             |       |
| shellfish                   |                                                                    |    |                    |                                             |            |             |       |
| Peanut                      |                                                                    |    |                    |                                             |            |             |       |
| Hazelnut                    |                                                                    |    |                    |                                             |            |             |       |
| Walnut                      |                                                                    |    |                    |                                             |            |             |       |
| Chocolate                   |                                                                    |    |                    |                                             |            |             |       |
| Apple                       |                                                                    |    |                    |                                             |            |             |       |
| Peach                       |                                                                    |    |                    |                                             |            |             |       |
| Bananas                     |                                                                    |    |                    |                                             |            |             |       |
| Kiwi fruit                  |                                                                    |    |                    |                                             |            |             |       |
| Orange                      |                                                                    |    |                    |                                             |            |             |       |
| Tomato                      |                                                                    |    |                    |                                             |            |             |       |
| Potato                      |                                                                    |    |                    |                                             |            |             |       |
| Avocado                     |                                                                    |    |                    |                                             |            |             |       |
| Carrot                      |                                                                    |    |                    |                                             |            |             |       |
| Celery                      |                                                                    |    |                    |                                             |            |             |       |
| Soybean                     |                                                                    |    |                    |                                             |            |             |       |
| Lentils                     |                                                                    |    |                    |                                             |            |             |       |
| Wheat**                     |                                                                    |    |                    |                                             |            |             |       |
| Buckwheat                   |                                                                    |    |                    |                                             |            |             |       |
| Corn                        |                                                                    |    |                    |                                             |            |             |       |
| Rice                        |                                                                    |    |                    |                                             |            |             |       |
| Sesame seed                 |                                                                    |    |                    |                                             |            |             |       |
| Mustard seed                |                                                                    |    |                    |                                             |            |             |       |
| Sulfur dioxide and sulfites |                                                                    |    |                    |                                             |            |             |       |

\*Other cow's milk products including butter, cheese, yoghurt, kefir, crème fraiche, ice-cream, shake

\*\*Including wheat products such as bread and breakfast cereals, bars, pancakes, pastry.

4. Has this child/participant had any problems eating any *other* food or foods?

Yes/No

If **'YES':** please list that foods:.....

5. Which of these foods mentioned above in points 3 and 4 caused *the most severe problems*? .....

5.1 How old was this child/participant/participant when had his/her first problem eating this food?  
.....

5.2 How often has this child/participant/participant had problem after eating this food?  
Only once;  
2-4 times;  
More than 4 times

5.3. When was the last episode?  
.....

5.4 Has this child/participant/participant avoided eating this food since his/her illness or problem?  
Yes/No

5.5 Does this problem was manifested like: (put the symptom in a circle possible multiple choice)

- 1- Itching, tingling or swelling in the mouth, lips or throat
- 2- A rash, nettle sting like rash or itchy skin
- 3- Diarrhea or vomiting (other than food poisoning)
- 4- Runny or stuffy nose
- 5- Red, sore or running eyes
- 6- Difficulty swallowing
- 7- Breathlessness
- 8- Stiffness in his/her joints
- 9- Fainting or dizziness
- 10- Headaches
- 11- Anaphylaxis
- 12-Other: (if yes please describe) .....

5.6 How long after eating the food did the first symptom appeared?  
-minutes;  
-hours;  
-days

5.7 How long did it last?  
-minutes;  
-hours;  
-days

5.8 How severe the manifestation was:  
Use the 10 points scale where 1-is not severe, almost imperceptible and 10-is extremely severe, hard to handle.  
1.....2.....3.....4.....5.....6.....7.....8.....9.....10

5.9 Did any treatment was applied?  
Yes/ No  
*If 'YES':* please provide the name of used medicine;  
.....  
.....  
.....  
.....

6. How old was this child/participant/participant when had his/her *first illness/ health problem* after eating *any* food?  
Immediately after birth;  
In 1<sup>st</sup> year of life;  
Before 3<sup>rd</sup> year of life;  
3-6<sup>th</sup> year of life;  
Later than 6<sup>th</sup> year of life  
If it is possible precise: .....

6.1 Which of these foods mentioned above in points 3 and 4 was the first causing health problem?

.....

6.2 Does this problem was manifested like: (if yes put the symptom in a circle-possible multiple choice)

- 1- Itching, tingling or swelling in the mouth, lips or throat
- 2- A rash, nettle sting like rash or itchy skin
- 3- Diarrhea or vomiting (other than food poisoning)
- 4- Runny or stuffy nose
- 5- Red, sore or running eyes
- 6- Difficulty swallowing
- 7- Breathlessness
- 8- Stiffness in his/her joints
- 9- Fainting or dizziness
- 10- Headaches
- 11- Anaphylaxis
- 12-Other: (if yes please describe) .....

6.3 How long after eating the food did the first symptom appeared?

- minutes
- hours
- days

6.4 How long did it last?

- minutes
- hours
- days

6.5 How severe the manifestation was:

Use the 10 points scale where 1-is not severe, almost imperceptible and 10-is extremely severe, hard to handle.

1.....2.....3.....4.....5.....6.....7.....8.....9.....10

6.6 Did any treatment was applied?

If yes, please provide the name of used medicine;

.....

.....

.....

.....

7. Does the allergy symptoms worsen after consuming a specific product (not type of food but specific product) –e.g., milk is to general- try to specify- skimmed milk, 2% milk, condensed milk, infant formula milk

.....

.....

.....

8. Does the allergy symptoms worsen after consuming *dairy products*?

Yes/ No

If 'YES': go to 8.1 If 'NO': go to 9.

8.1 How old was this child/participant/participant when had his/her first illness/ health problem after eating *dairy products*?

- immediately after birth;
- in 1st year of life;
- before 3rd year of life;
- 3–6th year of life;
- later than 6th year of life

If it is possible precise: .....

8.2 Does this problem was manifested like: (if yes put the symptom in a circle-possible multiple choice)

- 1- Itching, tingling or swelling in the mouth, lips or throat
- 2- A rash, nettle sting like rash or itchy skin
- 3- Diarrhea or vomiting (other than food poisoning)
- 4- Runny or stuffy nose
- 5- Red, sore or running eyes
- 6- Difficulty swallowing
- 7- Breathlessness
- 8- Stiffness in his/her joints
- 9- Fainting or dizziness
- 10- Headaches
- 11- Anaphylaxis
- 12-Other: (if yes please describe) .....

**8.3** Which of the following products make the symptoms worse? (possible multiple choice)

- 1. milk
- 2. yogurt
- 3. kefir
- 4 cottage cheese/ricotta
- 5. butter
- 6. buttermilk
- 7. cheese
- 8.goat/ sheep or milk of other mammals
- 9.Other

(what?) .....

**8.4** How long after eating the food did the first symptom appeared?

- minutes
- hours
- days

**8.5** How long did it last?

- minutes
- hours
- days

**8.6** How severe the manifestation was:

Use the 10 points scale where 1-is not severe, almost imperceptible and 10-is extremely severe, hard to handle.

1.....2.....3.....4.....5.....6.....7.....8.....9.....10

**8.7** Did any treatment was applied?

*If* 'YES' :please provide the name of used medicine;.....

**9.** How much milk / dairy products does the child/participant/participant consume?

- without limits,
- less than a glass a day (less due to ailments)
- less than a glass a day (despite the lack of ailments)
- does not consume at all because of ailments
- does not consume at all despite the lack of ailments

**10.** How the food allergy was diagnosed first time?

- medical interview
- skin test
- blood serum test
- provocation

- other (what?)

**ASTHMA AND ATOPY**

11. Has this child/participant/participant ever had wheezing or whistling in his/her chest?

Yes/ No

**If 'YES':**

11.1 How old was this child/participant/participant when he/she had his/her first attack of wheezing or whistling?

.....years

11.2 Did any treatment was applied?

**If 'YES':** please provide the name of used medicine;.....

12. Has this child/participant ever had asthma?

Yes/ No

**If 'YES':**

12.1 How old was this child/participant when he/she had his/her first attack of asthma?

.....years

12.2 Did any treatment was applied?

**If 'YES':** please provide the name of used medicine;.....

13. Does this child/participant have any nasal allergies?

Yes/ No

**If 'YES':**

13.1 How old was this child/participant when he/she first had nasal allergy?

.....years

13.2 Did any treatment was applied?

Yes/ No

**If 'YES':** please provide the name of used medicine;.....

13.3 Has this nasal problem been accompanied by itchy or watery eyes?

Yes/ No

14. Has this child/participant ever had an itchy rash?

Yes/ No

**If 'YES':**

14.1 How old was this child/participant when he/she first had itchy rash?

.....years

14.2 Has this child/participant had an itchy rash at any time that affected any of the following places: (possible multiple choice)

- the folds of the elbows
- behind the knees
- in front of the ankles
- around the neck
- around the ears
- around the eyes

15. Has this child/participant ever had eczema?

Yes/ No

**If 'YES':**

15.1 How old was this child/participant when he/she first had itchy rash?

.....years

16. Does this child/participant have an aggravation of health status in the presence of cat/dog/horse:

Yes/ No

**If 'YES':**

16.1. What is a manifestation: (possible multiple choice)

- start to cough?
- start to wheeze?
- get a feeling of tightness in his/her chest?
- start to feel short of breath?
- get a runny or stuffy nose or start to sneeze?
- get itchy or watering eyes?

17. Does this child/participant have an aggravation of health status in the presence of pollen:

Yes/ No

**If 'YES':**

17.1. What is a manifestation: (possible multiple choice)

- start to cough?
- start to wheeze?
- get a feeling of tightness in his/her chest?
- start to feel short of breath?
- get a runny or stuffy nose or start to sneeze?
- get itchy or watering eyes?

18. Has this child/participant ever had immunotherapy for allergy?

What allergens was he/she desensitized for?

- pollen counts
- mites
- latex
- insect venom
- others

19. Over time, has your child/participant experienced any changes in the intensity of the allergy manifestations?

- yes - intensification
- yes - mute
- no
- I do not know

**PREGNANCY, BIRTH AND INFANCY**

20. How old was the mother when she gave birth to this child/participant?

.....years

21. In what week of pregnancy the child/participant was born?

.....week

22. What was the method of birth

- naturally
- by caesarean section

23. How many points on the APGAR scale did child/participant receive after delivery?

.....points

24. Was this child/participant ever given **antibiotics** in the first two years of life?

Yes/ No

25. How often the **antibiotic** therapy was implemented:

1 – 2 times a year

-less often than once a year

3 – 4 times a year

-more than 4 times a year

26. Was this child/participant ever given **probiotics** in the first two years of life?

Yes/ No

27. How often **probiotics** were implemented:

1 – 2 times a year

-less often than once a year

3 – 4 times a year

-more than 4 times a year

- daily prophylaxis

28. During the infancy, the child/participant was:

- Only breastfed (if yes go to 27)

- Infant formula fed (if yes go to 28)

- Mixed fed (if yes go to 27 and 28)

29. How long the child/participant was fed naturally?

0 – 2 months

3 – 6 months

-longer than 6 months

30. Which of the following types of infant formula has this child/participant received?

- Normal cow's milk formula

- Normal soy milk formula

- Hypo-allergenic (modified) formula

31. At what age were solid foods provided to the diet?

.....months

32. Did the mother during pregnancy was taking probiotics?

Yes/No

33. What type of probiotics during pregnancy was taken:

-support for the microbiota of the genital tract

-support for the intestinal microbiota

34. Was the mother during pregnancy smoking?

Yes/No

35. Did mother follow any special diet during pregnancy?

Yes/No

*If 'YES' put the diet in a circle-possible multiple choice)*

- Weight reducing (low calories)

- Low cholesterol

- Elimination (caused by allergy/intolerance)

- Low sodium

- Diabetic

- High potassium

- Ulcer

- High protein

- High fat

- Vegan

- Vegetarian
- Mediterranean
- Oriental
- Low processed
- Other : .....

36. Was it driven by:

- family burden with allergic diseases
- protective effect of the fetus
- protective effect of the pregnant woman
- better well-being of the pregnant woman

**HOUSHOLD AND A FAMILY HISTORY OF ATOPY**

37. Place of residence of child/participant

- village
- city with 50 -100 thousand residents
- a city with over 100,000 residents

38. Parental education

- Primary school
- Technical
- Secondary
- Postgraduate

39. Professional status of child/participant/participant

- pupil
- student
- working person (manual worker)
- working person (white-collar worker)
- non-working person
- retired pensioner

40. How many brothers and sisters does this child/participant have or did have? Correct answer put in a circle-and add the exact number of siblings)

- only child
- older siblings: .....
- younger siblings:.....
- same age:.....

41. Did this child/participant go to a school, play-school or nursery?

Yes/No

42. Did the child/participant had contact with pets?

Yes/No

*If 'YES' please precise what it was:.....*

43. Did people related to child/participants had ever **food allergies**?

Yes/No

*If 'YES'*

**43.1** Who was that for a child/participant?

- siblings
- mother
- father
- grandparents
- other family member: .....(please specify the degree of relationship)

44. Did people related to child/participants had ever **cows' milk protein allergy**?

Yes/No

*If 'YES'*

**38.1** Who was that for a child/participant?

- siblings
- mother



- father
- grandparents
- other family member: .....(please specify the degree of relationship)

45. Did people related to child/participant had ever **other allergies**?

Yes/No

*If 'YES'*

45.1 Who was that for a child/participant?

- siblings
- mother
- father
- grandparents
- other family member: .....(please specify the degree of relationship)

46. Does the child/participant suffer any other diseases?

Yes/No

*If 'YES'*(possible multiple choice)

- circulatory system (ischemic heart disease, arrhythmias, defects
- heart, high blood pressure, heart failure, shortness of breath)
- respiratory system (pulmonary cystic fibrosis, chronic inflammation
- bronchitis, emphysema, sleep apnea)
- nervous and muscular systems (autism, epilepsy, muscular dystrophy)
- digestive system (peptic ulcer disease, inflammatory bowel diseases,
- malabsorption syndrome)
- cardiovascular system (hemophilia A or B, thrombocytopenia, vascular diathesis,
- anemia, leukemia, lymphoma)
- the urinary system (renal failure, inflammation of the kidneys)
- infectious diseases (Cytomegalic, hepatitis B or C, tuberculosis, AIDS)
- parasitic diseases
- cancers
- metabolic and endocrine diseases (diabetes, hyperthyroidism, hypothyroidism,
- hyperlipidemia, obesity, cachexia, adrenal gland disease, pheochromocytoma)
- other:.....

47. Does the mother of child/participants suffer any other diseases?

Yes/No

*If 'YES'*(possible multiple choice)

- circulatory system (ischemic heart disease, arrhythmias, defects
- heart, high blood pressure, heart failure, shortness of breath)
- respiratory system (pulmonary cystic fibrosis, chronic inflammation
- bronchitis, emphysema, sleep apnea)
- nervous and muscular systems (autism, epilepsy, muscular dystrophy)
- digestive system (peptic ulcer disease, inflammatory bowel diseases,
- malabsorption syndrome)
- cardiovascular system (hemophilia A or B, thrombocytopenia, vascular diathesis,
- anemia, leukemia, lymphoma)
- the urinary system (renal failure, inflammation of the kidneys)
- infectious diseases (Cytomegalic, hepatitis B or C, tuberculosis, AIDS)
- parasitic diseases
- cancers
- metabolic and endocrine diseases (diabetes, hyperthyroidism, hypothyroidism,
- hyperlipidemia, obesity, cachexia, adrenal gland disease, pheochromocytoma)
- other:.....

48. Does the child/participant follow any diet?

Yes/No

*If 'YES'* Please specify what type and go to 48.1:.....

If 'NO' go to 49.

48.1 When this diet was introduced:.....

48.2 What was the reason of diet introduction:.....

49. Does the child/participant eat meals in restaurant mass catering?

Yes/No

50. Is the child/participant familiar with the term of a 'hidden allergen'?

Yes/No

**BIOMETRIC DATA (inclusion/follow up)-completed by clinicians**

51. Weight of child/participant

.....kg

52. Height of child/participant

.....cm

53. Calculated BMI z-scores

.....

54. SCORAD scale if answers in questions 5.5, 6.2 or 8.2 includes answers (1–2) or *If 'YES' in 14,15* question.

.....



|                                            |                          |
|--------------------------------------------|--------------------------|
| Apples,<br>pear                            | 1 fruit                  |
| Apple                                      | Small                    |
| juice, cider                               | glass                    |
| Apricots                                   | ½ fruit                  |
| Avocado                                    | 1 fruit                  |
| Bananas                                    | 1 fruit                  |
| Blueberries                                | ½ cup                    |
| Oranges                                    | 1 fruit                  |
| Orange<br>juice                            | Small<br>glass           |
| Grapefruit                                 | ½ fruit                  |
| Grapefruit<br>juice                        | Small<br>glass           |
| Grapes,<br>cherries                        | ½ cup                    |
| Other fruit<br>juices                      | Small<br>glass           |
| Strawberries                               | ½ cup                    |
| Peaches                                    | 1 fruit                  |
| Plums                                      | ½ cup                    |
| Dried<br>raisins                           | 1 oz. or a<br>small pack |
| Dried<br>plums                             | 1 oz. or a<br>small pack |
| Vegetables                                 |                          |
| Beans                                      | ½ cup                    |
| Broccoli                                   | ½ cup                    |
| Brussel<br>sprouts                         | ½ cup                    |
| Cabbage<br>(including<br>cooked)           | ½ cup                    |
| Carrots                                    | 1 whole,<br>½ cup        |
| Carrot<br>juice                            | Small<br>glass           |
| Corn                                       | 1 ear, ½<br>cup          |
| Cauliflower                                | ½ cup                    |
| Celery                                     | 2–3 stick                |
| Cucumber<br>fresh                          | 3 slices                 |
| Eggplant,<br>zucchini,<br>summer<br>squash | ½ cup                    |
| Garlic                                     | 1 clove, 1<br>shake      |
| Lettuce                                    | 1 cup                    |

|                                                         |                 |
|---------------------------------------------------------|-----------------|
| Onion                                                   | ½ cup           |
| Peas,                                                   | ½ cup           |
| Mixed<br>vegetables                                     | ½ cup           |
| Sprouts                                                 | ½ cup           |
| Mushroom<br>s                                           | 1 each          |
| Pepper                                                  | 3 slices        |
| Yams,<br>sweet<br>potatoes                              | ½ cup<br>cooked |
| Spinach                                                 | ½ cup<br>cooked |
| Kale,<br>mustard,<br>chard<br>greens                    | ½ cup<br>cooked |
| Tomatoes                                                | 1 fruit         |
| Tomato<br>juice                                         | Small<br>glass  |
| Tofu or<br>soybeans                                     | 3–4 oz.         |
| Sauerkraut                                              | ½ cup           |
| Pickled<br>cucumbers                                    | ½ cup           |
| Eggs,<br>meats, fish                                    |                 |
| Eggs                                                    | 1               |
| Chicken,<br>turkey<br>with skin                         | 4–6 oz.         |
| Chicken,<br>turkey<br>without<br>skin                   | 4–6 oz.         |
| Processed<br>meats                                      | 1 slice         |
| Bacon                                                   | 2 slice         |
| Sausages                                                | 2               |
| Hamburger                                               | 1 patty         |
| Beef, lamb                                              | 4–6 oz.         |
| Pork                                                    | 4–6 oz.         |
| Canned<br>tuna fish                                     | 3–4 oz.         |
| Dark meat<br>fish e.g.,<br>tuna,<br>mackerel,<br>salmon | 3–5 oz.         |
| Other fish<br>e.g., cod,<br>halibut                     | 3–5 oz.         |

|                                                                   |                            |
|-------------------------------------------------------------------|----------------------------|
| Shrimp,<br>lobster,<br>scallops                                   | 3–5 oz.                    |
| Breads,<br>cereals,<br>starches                                   |                            |
| Cold<br>breakfast<br>cereal                                       | 1 cup                      |
| Cooked<br>oatmeal                                                 | 1 cup                      |
| Other<br>cooked<br>breakfast<br>cereal                            | 1 cup                      |
| White<br>bread<br>including                                       | 1 slice                    |
| pita                                                              |                            |
| Dark<br>bread<br>whole<br>grain<br>Rye/<br>Pumpernic<br>kel bread | 1 slice                    |
| English<br>muffins,<br>bagels,<br>rolls                           | 1                          |
| Muffins,<br>biscuits                                              | 1                          |
| Pancakes/<br>waffles                                              | 2 small<br>pieces          |
| Tortillas                                                         | 2                          |
| Brown rice                                                        | 1 cup                      |
| White rice                                                        | 1 cup                      |
| Pasta                                                             | 1 cup                      |
| Other<br>grains                                                   | 1 cup                      |
| French<br>fries                                                   | 6 oz. or<br>one<br>serving |
| Potatoes<br>(baked,<br>boiled,<br>mashed)                         | 1 whole, 1<br>cup          |
| Potatoe/<br>corn Chips                                            | 1 small<br>bag             |
| Crackers,<br>pretzels                                             | 4                          |
| Pizza                                                             | 2 slices                   |
| Beverages                                                         |                            |

|                                                |             |
|------------------------------------------------|-------------|
| Low-calorie drinks with caffeine               | 1 can       |
| Other low-calorie carbonated beverage          | 1 can       |
| Carbonated drinks with caffeine with sugar     | 1 can       |
| Carbonated beverage with sugar                 | 1 can       |
| Noncarbonated fruit drinks                     | 1 can       |
| Coffee                                         | 1 cup       |
| Black tea not herbal                           | 1 cup       |
| Green tea                                      | 1 cup       |
| Herbal tea decaffeinated coffee, cereal coffee | 1 cup       |
| Alcoholic drinks                               | 4 oz. glass |
| Plain water                                    | 8 oz. cup   |
| Sweets, baked goods and miscellaneous          |             |
| Chocolate                                      | 1 oz.       |
| Candy bars                                     | 1           |
| Candy, without chocolate                       | 1 oz.       |
| Cookies                                        | 1           |
| Pies (homemade or readymade)                   | 1 slice     |
| Doughnuts                                      | 1           |
| Jams, jellies                                  | 1 tbs       |

|                                                      |       |
|------------------------------------------------------|-------|
| Honey,                                               | 1 tbs |
| Peanut butter                                        | 1 tbs |
| Peanuts                                              | 1 oz. |
| Walnuts                                              | 1 oz. |
| Other nuts                                           | 1 oz. |
| Breakfast and energy bars e.g., granola, protein bar | 1     |
| Ketchup or chili sauce                               | 1 tbs |
| Regular mayonnaise                                   | 1 tbs |
| Fat-free mayonnaise                                  | 1 tbs |
| Olive oil                                            | 1 tbs |
| Other vegetable oil                                  | 1 tbs |
| Sugar                                                | 1 tbs |
| Artificial sweetener                                 | 1     |

---

2. How many teaspoons of sugar did you use to your beverages or food every day

.....Tbs

3. What type of margarine or spread did you used?

- Regular
- Light
- Nonfat

4. What kind of fat for baking was used at home?

- Butter
- Margarine
- Olive oil
- Vegetable oil
- Lard

5. Are there any important foods that you have been eating regularly apart from those mentioned above e.g., horseradish, mango, wheat germ, seaweed, algae, olives ...

If yes how often:

Food: ..... Frequency: .....

6. Did you take multi-vitamins?

- yes (if yes how many pills per week) ..... pills/week
- no

7. Not counting multi-vitamins did you take any of following preparations (if yes what was the dose)

- Vitamin A – ..... dose/day
- Vitamin B6– ..... dose/day



- Vitamin B9 – ..... dose/day
- B complex – .....dose/day
- Vitamin C – ..... dose/day
- Vitamin D – ..... dose/day
- Vitamin E– ..... dose/day
- Potassium – ..... dose/day
- Calcium – ..... dose/day
- Zinc – ..... dose/day
- Selenium – ..... dose/day
- Magnesium – ..... dose/day
- Fish oil -.....dose/day
- Flax seed– ..... dose/day
- Yeast flakes– ..... dose/day
- Probiotics– ..... dose/day
- Prebiotics e.g., inulins and FOS ..... dose day

8. Did you follow any special diet during pregnancy?

-Yes/-No If yes which one:

- Weight reducing (low calories)
- Low cholesterol
- Elimination (caused by allergy/intolerance)
- Low sodium
- Diabetic
- High potassium
- Ulcer

-Other : .....9. How strictly the special diet was adhered to?

- without derogations
- derogations 1–2 times a week
- derogations 3–4 times a week
- derogations more often than 4 times a week

10. Did you follow any other than standard diet during pregnancy

-Yes/-No

If yes which one:

- high protein
- high fat
- vegan
- vegetarian
- Mediterranean
- Oriental
- low processed
- other: .....

11. How strictly the diet was adhered to?

- without derogations
- derogations 1–2 times a week
- derogations 3–4 times a week
- derogations more often than 4 times a week

12. Was it caused by any medical reason

-Yes/ -No

If yes which one:

- family burden with allergic diseases
- protective effect of the fetus
- protective effect of the pregnant woman
- better well-being of the pregnant woman

Appendix A3- FFQ Survey results

| Variables                       | Units               | Compared groups                   |             |             |             | Mean serving | p value*     | Observed correlations                    |                                                     |
|---------------------------------|---------------------|-----------------------------------|-------------|-------------|-------------|--------------|--------------|------------------------------------------|-----------------------------------------------------|
|                                 |                     | Control                           | SFA         | PFA         | MFA         |              |              | Mean serving (frequency) vs. Total IgE** | Mean serving (frequency) vs. Severity of allergy ** |
| <b>Dairy foods</b>              | <b>Serving size</b> | <b>Number of servings per day</b> |             |             |             |              |              |                                          |                                                     |
| Skim, low-fat milk              | 8 oz. glass         | 0.37 ± 0.17                       | 0.39 ± 0.18 | 0.37 ± 0.17 | 0.39 ± 0.28 | 0.38 ± 0.17  | 0.916        | 0.197                                    | <b>0.435</b>                                        |
| 1-2%fat milk                    | 8 oz. glass         | 0.56 ± 0.54                       | 0.57 ± 0.55 | 0.57 ± 0.55 | 0.54 ± 0.52 | 0.56 ± 0.54  | 0.795        | <b>0.428</b>                             | 0.176                                               |
| Whole milk                      | 8 oz. glass         | 0.55 ± 0.52                       | 0.55 ± 0.52 | 0.52 ± 0.49 | 0.53 ± 0.50 | 0.54 ± 0.51  | 0.834        | 0.254                                    | 0.081                                               |
| Soy/plant milk                  | 8 oz. glass         | 0.07 ± 0.08                       | 0.07 ± 0.08 | 0.07 ± 0.08 | 0.07 ± 0.07 | 0.07 ± 0.08  | 0.845        | <b>0.449</b>                             | 0.453                                               |
| Cream                           | 1 tbs               | 0.08 ± 0.01                       | 0.08 ± 0.01 | 0.08 ± 0.01 | 0.08 ± 0.01 | 0.08 ± 0.01  | 0.946        | 0.151                                    | 0.223                                               |
| Sour cream                      | 1 tbs               | 0.16 ± 0.16                       | 0.16 ± 0.16 | 0.16 ± 0.16 | 0.17 ± 0.17 | 0.16 ± 0.16  | 0.742        | 0.075                                    |                                                     |
| Nondairy coffee whitener        | 1 tbs               | 0.19 ± 0.22                       | 0.18 ± 0.21 | 0.19 ± 0.22 | 0.19 ± 0.22 | 0.19 ± 0.22  | 0.805        | 0.064                                    |                                                     |
| Sherbet, ice milk               | 1 cup               | 0.29 ± 0.26                       | 0.29 ± 0.26 | 0.28 ± 0.25 | 0.29 ± 0.26 | 0.29 ± 0.26  | 0.969        | 0.185                                    | 0.379                                               |
| Ice cream                       | 1 cup               | 0.18 ± 0.17                       | 0.18 ± 0.17 | 0.18 ± 0.17 | 0.19 ± 0.18 | 0.18 ± 0.17  | 0.725        | 0.215                                    | 0.354                                               |
| Yogurt plain or low-carb        | 1 cup               | 0.14 ± 0.14                       | 0.14 ± 0.14 | 0.14 ± 0.14 | 0.14 ± 0.14 | 0.14 ± 0.14  | 0.929        | 0.072                                    | 0.032                                               |
| Yogurt sweetened with fruit     | 1 cup               | 0.42 ± 0.41                       | 0.41 ± 0.40 | 0.42 ± 0.41 | 0.39 ± 0.38 | 0.41 ± 0.40  | 0.802        | 0.209                                    | 0.419                                               |
| Kefir                           | 1 cup               | 0.26 ± 0.09                       | 0.26 ± 0.09 | 0.26 ± 0.09 | 0.26 ± 0.09 | 0.26 ± 0.09  | 0.784        | 0.156                                    | 0.056                                               |
| Buttermilk                      | 1 cup or            | 0.15 ± 0.09                       | 0.14 ± 0.09 | 0.16 ± 0.09 | 0.16 ± 0.10 | 0.15 ± 0.09  | 0.373        | 0.074                                    | 0.082                                               |
| Cottage or ricotta cheese       | 8 oz. glass         | 0.21 ± 0.21                       | 0.22 ± 0.22 | 0.20 ± 0.20 | 0.20 ± 0.20 | 0.21 ± 0.21  | 0.574        | 0.285                                    | 0.185                                               |
| Cream cheese                    | ½ cup               | 0.12 ± 0.08                       | 0.11 ± 0.08 | 0.12 ± 0.08 | 0.11 ± 0.08 | 0.12 ± 0.08  | 0.812        | 0.159                                    | 0.102                                               |
| Other cheese like rippened      | 1 oz. or 1 slice    | 0.44 ± 0.44                       | 0.43 ± 0.43 | 0.43 ± 0.43 | 0.44 ± 0.44 | 0.43 ± 0.43  | 0.910        | 0.270                                    | 0.112                                               |
| Tofu                            | 1 oz. or 1 slice    | 0.09 ± 0.10                       | 0.09 ± 0.10 | 0.10 ± 0.11 | 0.09 ± 0.10 | 0.09 ± 0.10  | 0.857        | <b>0.380</b>                             | 0.303                                               |
| Margarine                       | 1 pat               | 0.10 ± 0.08                       | 0.09 ± 0.08 | 0.10 ± 0.08 | 0.10 ± 0.08 | 0.10 ± 0.08  | 0.740        | 0.217                                    | 0.279                                               |
| Butter                          | 1 pat               | 0.50 ± 0.68                       | 0.51 ± 0.69 | 0.48 ± 0.66 | 0.50 ± 0.68 | 0.50 ± 0.68  | 0.942        | 0.212                                    | 0.395                                               |
| <b>Fruits (fresh and dried)</b> |                     |                                   |             |             |             |              |              |                                          | 0.083                                               |
| Apples, pear                    | 1 fruit             | 0.48 ± 0.71                       | 0.46 ± 0.68 | 0.50 ± 0.74 | 0.51 ± 0.75 | 0.41 ± 0.72  | <b>0.049</b> | <b>0.407</b>                             | 0.175                                               |
| Apple juice, cider              | Small glass         | 0.29 ± 0.39                       | 0.28 ± 0.38 | 0.29 ± 0.40 | 0.27 ± 0.37 | 0.28 ± 0.38  | 0.897        | 0.238                                    | 0.374                                               |
| Apricots                        | ½ fruit             | 0.13 ± 0.03                       | 0.12 ± 0.03 | 0.14 ± 0.03 | 0.12 ± 0.03 | 0.13 ± 0.03  | 0.827        | 0.099                                    | 0.263                                               |
| Avocado                         | 1 fruit             | 0.23 ± 0.2                        | 0.22 ± 0.19 | 0.22 ± 0.19 | 0.24 ± 0.21 | 0.23 ± 0.20  | 0.578        | 0.289                                    | 0.153                                               |
| Bananas                         | 1 fruit             | 0.43 ± 0.42                       | 0.43 ± 0.42 | 0.41 ± 0.40 | 0.43 ± 0.42 | 0.42 ± 0.41  | 0.978        | 0.327                                    | 0.121                                               |
| Blueberries                     | ½ cup               | 0.09 ± 0.10                       | 0.09 ± 0.10 | 0.09 ± 0.10 | 0.09 ± 0.10 | 0.09 ± 0.10  | 0.834        | 0.195                                    | 0.204                                               |
| Oranges                         | 1 fruit             | 0.4 ± 0.28                        | 0.42 ± 0.29 | 0.42 ± 0.29 | 0.40 ± 0.28 | 0.41 ± 0.29  | 0.783        | <b>0.378</b>                             | 0.233                                               |
| Orange juice                    | Small glass         | 0.44 ± 0.34                       | 0.42 ± 0.33 | 0.42 ± 0.32 | 0.46 ± 0.35 | 0.43 ± 0.34  | 0.586        | 0.326                                    | 0.328                                               |
| Grapefruit                      | ½ fruit             | 0.33 ± 0.14                       | 0.35 ± 0.15 | 0.34 ± 0.14 | 0.35 ± 0.15 | 0.34 ± 0.14  | 0.956        | 0.036                                    | 0.305                                               |
| Grapefruit juice                | Small glass         | 0.14 ± 0.13                       | 0.13 ± 0.12 | 0.15 ± 0.14 | 0.14 ± 0.13 | 0.14 ± 0.13  | 0.752        | 0.063                                    | 0.379                                               |
| Grapes, cherries                | ½ cup               | 0.16 ± 0.16                       | 0.17 ± 0.17 | 0.15 ± 0.15 | 0.17 ± 0.17 | 0.16 ± 0.16  | 0.999        | 0.054                                    | 0.257                                               |

|                                   |                       |             |             |             |             |             |       |              |              |
|-----------------------------------|-----------------------|-------------|-------------|-------------|-------------|-------------|-------|--------------|--------------|
| Other fruit juices                | Small glass           | 0.03 ± 0.03 | 0.03 ± 0.03 | 0.01 ± 0.03 | 0.03 ± 0.03 | 0.06 ± 0.09 | 0.985 | 0.255        | 0.399        |
| Strawberries                      | ½ cup                 | 0.15 ± 0.15 | 0.16 ± 0.16 | 0.15 ± 0.15 | 0.15 ± 0.15 | 0.15 ± 0.15 | 0.807 | 0.122        | 0.182        |
| Peaches                           | 1 fruit               | 0.12 ± 0.13 | 0.13 ± 0.14 | 0.12 ± 0.13 | 0.11 ± 0.12 | 0.12 ± 0.13 | 0.474 | 0.277        | 0.133        |
| Plums                             | ½ cup                 | 0.18 ± 0.09 | 0.17 ± 0.08 | 0.17 ± 0.09 | 0.29 ± 0.19 | 0.18 ± 0.09 | 0.196 | 0.289        | 0.357        |
| Dried raisins                     | 1 oz. or a small pack | 0.05 ± 0.05 | 0.05 ± 0.05 | 0.05 ± 0.05 | 0.05 ± 0.05 | 0.05 ± 0.05 | 0.905 | 0.239        | 0.161        |
| Dried plums                       | 1 oz. or a small pack | 0.07 ± 0.08 | 0.07 ± 0.08 | 0.07 ± 0.08 | 0.07 ± 0.08 | 0.07 ± 0.08 | 0.989 | 0.139        | 0.065        |
| <b>Vegetables</b>                 |                       |             |             |             |             |             |       |              | 0.143        |
| Beans                             | ½ cup                 | 0.11 ± 0.12 | 0.14 ± 0.12 | 0.10 ± 0.11 | 0.15 ± 0.13 | 0.11 ± 0.12 | 0.173 | <b>0.375</b> | 0.352        |
| Broccoli                          | ½ cup                 | 0.36 ± 0.42 | 0.38 ± 0.44 | 0.38 ± 0.45 | 0.36 ± 0.42 | 0.37 ± 0.43 | 0.848 | 0.260        | 0.344        |
| Brussel sprouts                   | ½ cup                 | 0.06 ± 0.16 | 0.06 ± 0.16 | 0.06 ± 0.16 | 0.06 ± 0.16 | 0.06 ± 0.16 | 0.991 | 0.088        | 0.440        |
| Cabbage (including cooked)        | ½ cup                 | 0.10 ± 0.15 | 0.10 ± 0.15 | 0.10 ± 0.15 | 0.14 ± 0.15 | 0.10 ± 0.15 | 0.911 | 0.202        | 0.126        |
| Carrots                           | 1 whole, ½ cup        | 0.39 ± 0.29 | 0.41 ± 0.30 | 0.38 ± 0.28 | 0.42 ± 0.31 | 0.40 ± 0.30 | 0.806 | 0.292        | 0.087        |
| Carrot juice                      | Small glass           | 0.29 ± 0.14 | 0.28 ± 0.14 | 0.34 ± 0.14 | 0.27 ± 0.13 | 0.28 ± 0.14 | 0.270 | <b>0.350</b> | 0.080        |
| Corn                              | 1 ear, ½ cup          | 0.12 ± 0.09 | 0.11 ± 0.08 | 0.11 ± 0.08 | 0.15 ± 0.10 | 0.12 ± 0.09 | 0.320 | 0.204        | 0.119        |
| Cauliflower                       | ½ cup                 | 0.19 ± 0.17 | 0.19 ± 0.17 | 0.20 ± 0.18 | 0.18 ± 0.16 | 0.19 ± 0.17 | 0.699 | 0.132        | 0.277        |
| Celery                            | 2–3 stick             | 0.14 ± 0.12 | 0.14 ± 0.12 | 0.17 ± 0.13 | 0.15 ± 0.12 | 0.14 ± 0.12 | 0.632 | <b>0.392</b> | 0.385        |
| Cucumber fresh                    | 3 slices              | 0.21 ± 0.11 | 0.22 ± 0.11 | 0.20 ± 0.11 | 0.22 ± 0.12 | 0.21 ± 0.11 | 0.961 | 0.138        | 0.135        |
| Eggplant, zucchini, summer squash | ½ cup                 | 0.09 ± 0.07 | 0.09 ± 0.07 | 0.09 ± 0.07 | 0.09 ± 0.07 | 0.09 ± 0.07 | 0.856 | 0.031        | 0.192        |
| Garlic                            | 1 clove, 1 shake      | 0.10 ± 0.11 | 0.10 ± 0.11 | 0.10 ± 0.11 | 0.10 ± 0.11 | 0.10 ± 0.11 | 0.839 | 0.162        | 0.441        |
| Lettuce                           | 1 cup                 | 0.44 ± 0.43 | 0.46 ± 0.45 | 0.47 ± 0.46 | 0.43 ± 0.42 | 0.45 ± 0.44 | 0.695 | 0.054        | 0.353        |
| Onion                             | ½ cup                 | 0.27 ± 0.06 | 0.17 ± 0.06 | 0.17 ± 0.06 | 0.18 ± 0.06 | 0.17 ± 0.06 | 0.580 | 0.167        | 0.098        |
| Mixed vegetables                  | ½ cup                 | 0.25 ± 0.29 | 0.24 ± 0.28 | 0.25 ± 0.29 | 0.26 ± 0.30 | 0.25 ± 0.29 | 0.772 | 0.021        | 0.156        |
| Sprouts                           | ½ cup                 | 0.09 ± 0.40 | 0.09 ± 0.41 | 0.09 ± 0.40 | 0.10 ± 0.43 | 0.09 ± 0.41 | 0.926 | 0.188        | 0.121        |
| Mushrooms                         | ½ cup                 | 0.10 ± 0.09 | 0.11 ± 0.09 | 0.10 ± 0.09 | 0.10 ± 0.09 | 0.10 ± 0.09 | 0.763 | 0.170        | 0.196        |
| Pepeer                            | 1 each                | 0.14 ± 0.14 | 0.14 ± 0.14 | 0.14 ± 0.14 | 0.15 ± 0.15 | 0.14 ± 0.14 | 0.741 | 0.425        | 0.322        |
| Yams, sweet potatoes              | 3 slices              | 0.12 ± 0.12 | 0.12 ± 0.12 | 0.11 ± 0.11 | 0.13 ± 0.13 | 0.12 ± 0.12 | 0.754 | 0.162        | 0.303        |
| Spinach                           | ½ cup cooked          | 0.11 ± 0.21 | 0.11 ± 0.20 | 0.12 ± 0.22 | 0.11 ± 0.22 | 0.11 ± 0.21 | 0.906 | 0.210        | 0.222        |
| Kale, mustard, chard greens       | ½ cup cooked          | 0.03 ± 0.03 | 0.03 ± 0.03 | 0.03 ± 0.03 | 0.03 ± 0.03 | 0.03 ± 0.03 | 0.881 | 0.306        | 0.091        |
| Tomatoes                          | ½ cup cooked          | 0.47 ± 0.26 | 0.45 ± 0.25 | 0.46 ± 0.25 | 0.45 ± 0.25 | 0.46 ± 0.25 | 0.923 | 0.078        | 0.332        |
| Tomato juice                      | 1 fruit               | 0.17 ± 0.07 | 0.18 ± 0.07 | 0.17 ± 0.07 | 0.18 ± 0.07 | 0.18 ± 0.07 | 0.966 | 0.064        | 0.200        |
| Tofu or soybeans                  | Small glass           | 0.08 ± 0.18 | 0.08 ± 0.19 | 0.07 ± 0.17 | 0.08 ± 0.18 | 0.08 ± 0.18 | 0.892 | <b>0.366</b> | 0.297        |
| Sauerkraut and cucumbers          | 3–4 oz.               | 0.20 ± 0.10 | 0.21 ± 0.10 | 0.23 ± 0.10 | 0.19 ± 0.09 | 0.20 ± 0.10 | 0.305 | 0.070        | 0.216        |
| Pickled cucumbers                 | ½ cup                 | 0.32 ± 0.11 | 0.31 ± 0.11 | 0.34 ± 0.12 | 0.36 ± 0.10 | 0.32 ± 0.11 | 0.060 | 0.203        | 0.152        |
| <b>Eggs, meats, fish</b>          |                       |             |             |             |             |             |       |              |              |
| Eggs                              | 1                     | 0.29 ± 0.32 | 0.28 ± 0.31 | 0.30 ± 0.34 | 0.29 ± 0.32 | 0.29 ± 0.32 | 0.864 | 0.019        | 0.267        |
| Chicken, turkey with skin         | 4–6 oz.               | 0.21 ± 0.19 | 0.21 ± 0.19 | 0.21 ± 0.19 | 0.21 ± 0.19 | 0.21 ± 0.19 | 0.916 | 0.247        | 0.166        |
| Chicken, turkey without skin      | 4–6 oz.               | 0.25 ± 0.16 | 0.27 ± 0.17 | 0.26 ± 0.16 | 0.26 ± 0.17 | 0.26 ± 0.17 | 0.831 | 0.104        | 0.247        |
| Processed meats                   | 1 slice               | 0.16 ± 0.06 | 0.15 ± 0.06 | 0.17 ± 0.06 | 0.17 ± 0.06 | 0.16 ± 0.06 | 0.169 | 0.042        | <b>0.350</b> |
| Bacon                             | 2 slice               | 0.10 ± 0.12 | 0.09 ± 0.11 | 0.10 ± 0.12 | 0.10 ± 0.12 | 0.10 ± 0.12 | 0.819 | 0.214        | 0.207        |
| Sausages                          | 2                     | 0.15 ± 0.16 | 0.15 ± 0.16 | 0.15 ± 0.15 | 0.14 ± 0.15 | 0.15 ± 0.16 | 0.719 | 0.285        | 0.152        |

|                                                |                      |             |             |             |             |             |       |              |       |  |
|------------------------------------------------|----------------------|-------------|-------------|-------------|-------------|-------------|-------|--------------|-------|--|
| Hamburger                                      | 1 patty              | 0.21 ± 0.12 | 0.20 ± 0.12 | 0.22 ± 0.13 | 0.20 ± 0.11 | 0.21 ± 0.12 | 0.883 | 0.076        | 0.223 |  |
| Beef, lamb                                     | 4–6 oz.              | 0.39 ± 0.41 | 0.39 ± 0.41 | 0.38 ± 0.39 | 0.39 ± 0.41 | 0.39 ± 0.41 | 0.970 | 0.160        | 0.268 |  |
| Pork                                           | 4–6 oz.              | 0.11 ± 0.11 | 0.11 ± 0.11 | 0.11 ± 0.11 | 0.11 ± 0.11 | 0.11 ± 0.11 | 0.855 | 0.104        | 0.122 |  |
| Canned tuna fish                               | 3–4 oz.              | 0.25 ± 0.21 | 0.26 ± 0.22 | 0.25 ± 0.21 | 0.24 ± 0.20 | 0.25 ± 0.21 | 0.614 | 0.244        | 0.102 |  |
| Dark meat fish e.g., tuna, mackerel, salmon    | 3–5 oz.              | 0.15 ± 0.15 | 0.14 ± 0.14 | 0.20 ± 0.16 | 0.15 ± 0.15 | 0.15 ± 0.15 | 0.784 | -0.211       | 0.232 |  |
| Other fish e.g., cod, halibut                  | 3–5 oz.              | 0.16 ± 0.16 | 0.26 ± 0.16 | 0.15 ± 0.15 | 0.15 ± 0.15 | 0.16 ± 0.16 | 0.648 | 0.006        | 0.151 |  |
| Shrimp, lobster, scallops                      | 3–5 oz.              | 0.04 ± 0.14 | 0.04 ± 0.14 | 0.04 ± 0.14 | 0.04 ± 0.13 | 0.04 ± 0.14 | 0.988 | 0.127        | 0.155 |  |
| <b>Breads, cereals, starches</b>               |                      |             |             |             |             |             |       |              |       |  |
| Cold breakfast cereal                          | 1 cup                | 0.37 ± 0.38 | 0.34 ± 0.35 | 0.36 ± 0.37 | 0.38 ± 0.39 | 0.36 ± 0.37 | 0.629 | 0.273        | 0.268 |  |
| Cooked oatmeal                                 | 1 cup                | 0.18 ± 0.18 | 0.17 ± 0.17 | 0.19 ± 0.19 | 0.17 ± 0.17 | 0.18 ± 0.18 | 0.924 | 0.342        | 0.108 |  |
| Other cooked breakfast cereal                  | 1 cup                | 0.09 ± 0.09 | 0.09 ± 0.09 | 0.09 ± 0.09 | 0.09 ± 0.09 | 0.09 ± 0.09 | 0.949 | 0.197        | 0.074 |  |
| White bread including pita                     | 1 slice              | 0.71 ± 0.31 | 0.74 ± 0.32 | 0.74 ± 0.32 | 0.74 ± 0.32 | 0.73 ± 0.32 | 0.952 | <b>0.415</b> | 0.356 |  |
| Dark bread whole grain                         | 1 slice              | 0.80 ± 0.29 | 0.85 ± 0.31 | 0.79 ± 0.29 | 0.81 ± 0.29 | 0.81 ± 0.29 | 0.461 | 0.098        | 0.226 |  |
| Rye/ Pumpernickel bread                        | 1 slice              | 0.08 ± 0.09 | 0.08 ± 0.09 | 0.08 ± 0.09 | 0.08 ± 0.09 | 0.08 ± 0.09 | 0.913 | 0.138        | 0.177 |  |
| English muffins, bagels, rolls                 | 1                    | 0.18 ± 0.13 | 0.17 ± 0.12 | 0.17 ± 0.13 | 0.18 ± 0.13 | 0.18 ± 0.13 | 0.759 | 0.088        | 0.340 |  |
| Muffins, biscuits                              | 1                    | 0.27 ± 0.26 | 0.27 ± 0.26 | 0.29 ± 0.28 | 0.27 ± 0.26 | 0.27 ± 0.26 | 0.991 | 0.171        | 0.131 |  |
| Pancakes/ waffles                              | 2 small pieces       | 0.64 ± 0.69 | 0.65 ± 0.71 | 0.63 ± 0.68 | 0.67 ± 0.72 | 0.65 ± 0.70 | 0.909 | 0.214        | 0.461 |  |
| Tortillas                                      | 2                    | 0.08 ± 0.08 | 0.07 ± 0.07 | 0.08 ± 0.08 | 0.08 ± 0.08 | 0.08 ± 0.08 | 0.734 | 0.184        | 0.197 |  |
| Brown rice                                     | 1 cup                | 0.12 ± 0.09 | 0.12 ± 0.09 | 0.13 ± 0.09 | 0.11 ± 0.08 | 0.12 ± 0.09 | 0.643 | 0.173        | 0.418 |  |
| White rice                                     | 1 cup                | 0.19 ± 0.11 | 0.19 ± 0.11 | 0.20 ± 0.11 | 0.20 ± 0.11 | 0.19 ± 0.11 | 0.561 | 0.339        | 0.262 |  |
| Pasta                                          | 1 cup                | 0.20 ± 0.19 | 0.21 ± 0.20 | 0.20 ± 0.19 | 0.21 ± 0.20 | 0.21 ± 0.19 | 0.969 | 0.212        | 0.021 |  |
| Other grains                                   | 1 cup                | 0.37 ± 0.31 | 0.39 ± 0.33 | 0.36 ± 0.30 | 0.35 ± 0.30 | 0.37 ± 0.31 | 0.491 | 0.292        | 0.196 |  |
| French fries                                   | 6 oz. or one serving | 0.31 ± 0.34 | 0.32 ± 0.35 | 0.29 ± 0.32 | 0.31 ± 0.34 | 0.31 ± 0.34 | 0.878 | 0.199        | 0.327 |  |
| Potatoes (baked, boiled, mashed)               | 1 whole, 1 cup       | 0.47 ± 0.49 | 0.49 ± 0.51 | 0.44 ± 0.46 | 0.48 ± 0.50 | 0.47 ± 0.49 | 0.926 | 0.283        | 0.115 |  |
| Potatoe/ corn Chips                            | 1 small bag          | 0.39 ± 0.35 | 0.38 ± 0.34 | 0.37 ± 0.33 | 0.39 ± 0.35 | 0.38 ± 0.34 | 0.921 | 0.245        | 0.186 |  |
| Crackers, pretzels                             | 4                    | 0.11 ± 0.11 | 0.10 ± 0.10 | 0.11 ± 0.11 | 0.10 ± 0.10 | 0.11 ± 0.11 | 0.820 | 0.127        | 0.110 |  |
| Pizza                                          | 2 slices             | 0.22 ± 0.18 | 0.22 ± 0.18 | 0.21 ± 0.17 | 0.21 ± 0.17 | 0.21 ± 0.18 | 0.797 | 0.260        | 0.340 |  |
| <b>Beverages</b>                               |                      |             |             |             |             |             |       |              |       |  |
| Low-calorie drinks with caffeine               | 1 can                | 0.10 ± 0.10 | 0.10 ± 0.00 | 0.10 ± 0.00 | 0.10 ± 0.00 | 0.10 ± 0.00 | 0.999 | 0.142        | 0.228 |  |
| Other low-calorie carbonated beverage          | 1 can                | 0.16 ± 0.17 | 0.16 ± 0.17 | 0.16 ± 0.17 | 0.16 ± 0.17 | 0.16 ± 0.17 | 0.962 | 0.284        | 0.251 |  |
| Carbonated drinks with caffeine with sugar     | 1 can                | 0.12 ± 0.12 | 0.12 ± 0.12 | 0.11 ± 0.11 | 0.13 ± 0.13 | 0.12 ± 0.12 | 0.836 | 0.216        | 0.255 |  |
| Carbonated beverage with sugar                 | 1 can                | 0.17 ± 0.17 | 0.16 ± 0.16 | 0.17 ± 0.17 | 0.18 ± 0.18 | 0.17 ± 0.17 | 0.528 | 0.259        | 0.210 |  |
| Noncarbonated fruit drinks                     | 1 can                | 0.27 ± 0.26 | 0.27 ± 0.26 | 0.27 ± 0.26 | 0.28 ± 0.27 | 0.27 ± 0.26 | 0.879 | 0.193        | 0.227 |  |
| Coffee                                         | 1 cup                | 0.93 ± 0.79 | 0.99 ± 0.84 | 0.94 ± 0.79 | 0.90 ± 0.76 | 0.94 ± 0.80 | 0.545 | 0.187        | 0.195 |  |
| Black tea not herbal                           | 1 cup                | 1.73 ± 1.51 | 1.64 ± 1.43 | 1.70 ± 1.48 | 1.67 ± 1.46 | 1.68 ± 1.47 | 0.913 | 0.161        | 0.121 |  |
| Green tea                                      | 1 cup                | 0.32 ± 0.26 | 0.28 ± 0.27 | 0.26 ± 0.25 | 0.27 ± 0.26 | 0.27 ± 0.26 | 0.149 | -0.326       | 0.107 |  |
| Herbal tea decaffeinated coffee, cereal coffee | 1 cup                | 0.99 ± 1.05 | 0.93 ± 0.99 | 1.02 ± 1.08 | 1.02 ± 1.08 | 0.99 ± 1.05 | 0.669 | 0.183        | 0.224 |  |
| Alcoholic drinks                               | 4 oz. glass          | 0.02 ± 0.03 | 0.02 ± 0.03 | 0.02 ± 0.03 | 0.00 ± 0.03 | 0.00 ± 0.03 | 0.924 | 0.211        | 0.138 |  |
| Plain water                                    | 8 oz. cup            | 2.92 ± 2.81 | 2.85 ± 2.74 | 3.02 ± 2.91 | 2.82 ± 2.71 | 2.90 ± 2.79 | 0.953 | 0.119        | 0.206 |  |
| <b>Sweets, baked goods and miscellaneous</b>   |                      |             |             |             |             |             |       |              |       |  |

|                                                      |                     |             |             |             |             |             |                   |                          |              |
|------------------------------------------------------|---------------------|-------------|-------------|-------------|-------------|-------------|-------------------|--------------------------|--------------|
| Chocolate                                            | 1 oz.               | 0.32 ± 0.35 | 0.31 ± 0.33 | 0.31 ± 0.33 | 0.31 ± 0.34 | 0.31 ± 0.34 | 0.942             | 0.267                    | 0.103        |
| Candy bars                                           | 1                   | 0.13 ± 0.13 | 0.14 ± 0.14 | 0.12 ± 0.12 | 0.13 ± 0.13 | 0.13 ± 0.13 | 0.808             | 0.280                    | 0.193        |
| Candy, without chocolate                             | 1 oz.               | 0.38 ± 0.35 | 0.39 ± 0.36 | 0.39 ± 0.36 | 0.38 ± 0.35 | 0.38 ± 0.35 | 0.922             | 0.216                    | 0.263        |
| Cookies                                              | 1                   | 0.41 ± 0.38 | 0.42 ± 0.39 | 0.38 ± 0.36 | 0.41 ± 0.38 | 0.41 ± 0.38 | 0.897             | 0.227                    | 0.207        |
| Pies (homemade or readymade)                         | 1 slice             | 0.29 ± 0.29 | 0.29 ± 0.29 | 0.29 ± 0.29 | 0.30 ± 0.30 | 0.29 ± 0.29 | 0.931             | 0.266                    | 0.192        |
| Doughnuts                                            | 1                   | 0.13 ± 0.12 | 0.13 ± 0.12 | 0.14 ± 0.13 | 0.13 ± 0.12 | 0.13 ± 0.12 | 0.887             | 0.186                    | 0.181        |
| Jams, jellies                                        | 1 tbs               | 0.13 ± 0.14 | 0.13 ± 0.15 | 0.12 ± 0.13 | 0.13 ± 0.14 | 0.13 ± 0.14 | 0.861             | 0.062                    | 0.197        |
| Honey                                                | 1 tbs               | 0.12 ± 0.11 | 0.12 ± 0.11 | 0.12 ± 0.11 | 0.12 ± 0.11 | 0.12 ± 0.11 | 0.837             | 0.028                    | 0.184        |
| Peanut butter                                        | 1 tbs               | 0.14 ± 0.13 | 0.13 ± 0.12 | 0.15 ± 0.14 | 0.14 ± 0.13 | 0.14 ± 0.13 | 0.774             | 0.214                    | 0.218        |
| Peanuts                                              | 1 oz.               | 0.23 ± 0.09 | 0.13 ± 0.09 | 0.16 ± 0.09 | 0.13 ± 0.09 | 0.13 ± 0.09 | 0.277             | <b>0.356</b>             | 0.308        |
| Walnuts                                              | 1 oz.               | 0.29 ± 0.23 | 0.23 ± 0.23 | 0.24 ± 0.24 | 0.23 ± 0.23 | 0.13 ± 0.23 | 0.160             | <b>0.354</b>             | <b>0.395</b> |
| Other nuts                                           | 1 oz.               | 0.02 ± 0.02 | 0.02 ± 0.02 | 0.02 ± 0.02 | 0.02 ± 0.02 | 0.02 ± 0.02 | 0.772             | 0.017                    | 0.271        |
| Breakfast and energy bars e.g., granola, protein bar | 1                   | 0.11 ± 0.11 | 0.12 ± 0.12 | 0.10 ± 0.10 | 0.12 ± 0.12 | 0.11 ± 0.11 | 0.905             | 0.120                    | 0.165        |
| Ketchup or chili sauce                               | 1 tbs               | 0.34 ± 0.25 | 0.35 ± 0.26 | 0.36 ± 0.27 | 0.33 ± 0.25 | 0.35 ± 0.25 | 0.679             | 0.197                    | 0.289        |
| Regular mayonnaise                                   | 1 tbs               | 0.24 ± 0.25 | 0.26 ± 0.27 | 0.23 ± 0.23 | 0.25 ± 0.26 | 0.24 ± 0.25 | 0.910             | 0.230                    | 0.267        |
| Fat-free mayonnaise                                  | 1 tbs               | 0.05 ± 0.05 | 0.05 ± 0.05 | 0.05 ± 0.05 | 0.05 ± 0.05 | 0.05 ± 0.05 | 0.881             | 0.261                    | <b>0.447</b> |
| Olive oil                                            | 1 tbs               | 0.35 ± 0.26 | 0.22 ± 0.24 | 0.27 ± 0.26 | 0.27 ± 0.26 | 0.27 ± 0.26 | 0.078             | -0.317                   | -0.165       |
| Other vegetable oil                                  | 1 tbs               | 0.31 ± 0.34 | 0.29 ± 0.32 | 0.31 ± 0.34 | 0.32 ± 0.35 | 0.31 ± 0.34 | 0.634             | 0.363                    | 0.074        |
| Sugar                                                | 1 tbs               | 0.22 ± 0.28 | 0.23 ± 0.29 | 0.21 ± 0.27 | 0.21 ± 0.27 | 0.22 ± 0.28 | 0.732             | 0.094                    | 0.229        |
| Artificial sweetener                                 | 1                   | 0.09 ± 0.8  | 0.08 ± 0.75 | 0.09 ± 0.79 | 0.09 ± 0.81 | 0.09 ± 0.79 | 0.971             | 0.145                    | 0.338        |
| <b>Supplements:</b>                                  |                     |             |             |             |             |             |                   | Qualitative <sup>c</sup> |              |
| multi-vitamins                                       | %                   | 48.7        | 48.9        | 60.9        | 55          | 53.38       | 0.474             | 0.293                    | 0.251        |
| Folic acid                                           | %                   | 48.7        | 53.2        | 50          | 46.7        | 49.65       | 0.821             | 0.295                    | 0.266        |
| Vitamin D                                            | %                   | 37.4        | 31.9        | 34.7        | 33.3        | 34.33       | 0.751             | 0.281                    | 0.148        |
| Fish Oil                                             | %                   | 26.6        | 27.7        | 32.6        | 30          | 29.23       | 0.876             | -0.171                   | 0.080        |
| Probiotics                                           | %                   | 12.7        | 25.5        | 34.8        | 41.7        | 28.68       | <b>0.002</b>      | <b>-0.411</b>            | -0.285       |
| <b>Diets:</b>                                        |                     |             |             |             |             |             |                   |                          |              |
| Elimination diet                                     | %                   | 6.7         | 10.6        | 34.8        | 38.3        | 22.60       | <b>&lt; 0.001</b> | <b>0.361</b>             | <b>0.596</b> |
| Diabetic                                             | %                   | 35.3        | 36.2        | 41.3        | 31.7        | 36.13       | 0.812             | 0.304                    | <b>0.441</b> |
| Cholestatic (low fat)                                | %                   | 4.7         | 6.4         | 23.9        | 15          | 12.50       | <b>0.006</b>      | 0.339                    | 0.398        |
| Vega/Vegetarian                                      | %                   | 12.7        | 2.1         | 8.7         | 14          | 9.38        | 0.175             | <b>0.416</b>             | 0.336        |
| Mediterranean                                        | %                   | 3.3         | 0           | 2.2         | 0           | 1.38        | 0.9               | 0.112                    | 0.215        |
| Diet adherence                                       | a.u (neglects/week) | 2.4 ± 0.7   | 2.6 ± 0.5   | 2.9 ± 0.5   | 3.8 ± 0.6   | 4.9 ± 0.6   | 0.016             | 0.293                    | <b>0.489</b> |

SFA—allergy to single food-origin allergen, PFA—polyallergy to various food-origin allergens, MFA—mixed polyallergy to aero- and food-origin allergens. Data are presented as the means ±SD or percentages. \* *p* values for tests <sup>a</sup> of the Chi-Square test for comparison between groups of nominal data. <sup>b</sup> *p* value of the Kruskal- Wallis test for quantitative data for comparison between groups with Bonferroni's corrected significance threshold of 0.008. \*\* Pearson's *r* results and <sup>c</sup> for qualitative variables Spearman Significant associations are marked in bold.

Appendix A4- Immunological parameters associations

Table S4. Clinical parameters correlation by health status categories.

| Pearson Correlation Factors |       | Control (n-150) |                |              | Allergy (n-153) |                |                   |
|-----------------------------|-------|-----------------|----------------|--------------|-----------------|----------------|-------------------|
|                             |       | r               | r <sup>2</sup> | p            | r               | r <sup>2</sup> | p                 |
| Total IgE ×                 | IL-2  | 0.094           | 0.009          | 0.255        | <b>0.185</b>    | <b>0.034</b>   | <b>0.001</b>      |
|                             | IL-4  | -0.093          | 0.009          | 0.260        | <b>0.439</b>    | <b>0.193</b>   | <b>&lt; 0.001</b> |
|                             | IL-8  | 0.072           | 0.005          | 0.400        | <b>0.399</b>    | <b>0.160</b>   | <b>&lt; 0.001</b> |
|                             | INF-γ | 0.131           | 0.017          | 0.110        | <b>0.162</b>    | <b>0.026</b>   | <b>0.005</b>      |
| Total IgG ×                 | IL-2  | <b>0.237</b>    | <b>0.056</b>   | <b>0.003</b> | -0.115          | 0.013          | 0.159             |
|                             | IL-4  | 0.051           | 0.003          | 0.539        | <b>0.343</b>    | <b>0.118</b>   | <b>&lt; 0.001</b> |
|                             | IL-8  | -0.043          | 0.002          | 0.604        | <b>0.545</b>    | <b>0.297</b>   | <b>&lt; 0.001</b> |
|                             | INF-γ | 0.062           | 0.004          | 0.450        | 0.077           | 0.006          | 0.344             |
| IL-2 ×                      | IL-4  | -0.142          | 0.020          | 0.083        | 0.196           | 0.038          | 0.015             |
|                             | IL-8  | -0.099          | 0.010          | 0.226        | -0.112          | 0.013          | 0.168             |
| IL-4 ×                      | INF-γ | -0.035          | 0.001          | 0.670        | <b>0.496</b>    | <b>0.246</b>   | <b>&lt; 0.001</b> |
| IL-8 ×                      | INF-γ | -0.057          | 0.003          | 0.490        | <b>0.365</b>    | <b>0.133</b>   | <b>&lt; 0.001</b> |

Significant associations of Pearson correlation parameters (r, r<sup>2</sup>, p) with 95% Confidence are marked in **bold**.

Appendix 5- The contribution of variables in not major factors of multivariate analyses

Table S5. Cluster description of multivariate analysis (PCA) with IgG level as a grouping variable in allergy profile associated to gestational and early life dietary behavior.

| Cluster | Immunological Parameters                                                                                                                                                                                | Dieting and other Variables                                                                                                                     | r values that are different from 0 with a significance level alpha = 0.05 |
|---------|---------------------------------------------------------------------------------------------------------------------------------------------------------------------------------------------------------|-------------------------------------------------------------------------------------------------------------------------------------------------|---------------------------------------------------------------------------|
| i       | high total IgG but low total IgE, strong reaction (cl. 4–5) to latex and citruses but also to <i>Aspergillus fumigatus</i> (cl.3–4), low to moderate content of IFNγ and IL-2                           | subjects on mixed and infant formula feeding type, revealed overweight BMI status                                                               | 0.549                                                                     |
| ii      | high total IgG, moderate total IgE, medium (cl. 2- 4) of antibodies to apple, carrot and to <i>Aspergillus fumigatus</i> and high(cl.4–5) to birch and, <i>Cladosporium</i> , high content of IL-2/IFNγ | subjects on mixed and infant formula feeding type, maternal gestational diabetic and cholestatic diets, subjects revealed overweight BMI status | 0.434                                                                     |
| iii     | moderate total IgG, moderate total IgE, low (cl. 1–2) of antibodies to milk and high to peanut and soybean (cl. 4–5), moderate level of cytokines IL-4/IL-8/IFNγ                                        | maternal gestational cholestatic / vegetarian diets and supplemented with probiotics during pregnancy                                           | 0.348                                                                     |

|     |                                                                                                                                                                                                               |                                                                                                                                |       |
|-----|---------------------------------------------------------------------------------------------------------------------------------------------------------------------------------------------------------------|--------------------------------------------------------------------------------------------------------------------------------|-------|
| iv  | low total IgG, low total IgE, moderate (cl. 2–3 level of antibodies to tomato, milk and sesame, moderate level of IL4 and IL-8                                                                                | maternal standard or elimination diet, subjects mostly female                                                                  | 0.373 |
| v   | low total IgG, low total IgE, but medium (cl. 3–4) level of antibodies to tomato, sesame, milk - BSA and high (cl. 4–5) to dust mites, moderate level of IL4 and IL-8                                         | maternal standard or elimination diet, subjects mostly female                                                                  | 0.414 |
| vi  | moderate total IgG, high total IgE, high (cl. 3–5) levels of anti-cows' milk proteins, anti-eggs and anti-nuts antibodies but also strong reaction to pollen and dander (cl. 4–6), high level of IL4 and IL-8 | maternal gestational diabetic and cholestatic diets, subjects revealed underweight BMI status and supplemented with probiotics | 0.626 |
| vii | low total IgG, low total IgE, low (cl.1–2) of antibodies to milk and beef, high level of IL4 and IL-8                                                                                                         | subjects breastfed, mothers were on vegan/ vegetarian and or eliminating diet and took probiotics                              | 0.482 |

**Appendix 6-** The significance of associations in clusters in multivariate analysis with grouping variable IgG

**Table S6.** 3–9 Factors for PCA analysis presented in Figure 3.

|                               | F3     | F4     | F5    | F6    | F7    | F8     | F9     |
|-------------------------------|--------|--------|-------|-------|-------|--------|--------|
| Grass mix (gx)                | 0.214  | 0.106  | 0.451 | 1.018 | 0.100 | 0.161  | 0.226  |
| Birch (t3)                    | 0.543  | 0.862  | 0.667 | 0.128 | 0.228 | 0.088  | 0.486  |
| Mugwort (w6)                  | 0.293  | 0.170  | 0.844 | 0.169 | 0.311 | 3.509  | 0.005  |
| Dermatophagoides pter. (d1)   | 2.355  | 5.689  | 0.020 | 4.281 | 0.014 | 0.151  | 0.108  |
| Dermatophagoides farinae (d2) | 3.474  | 5.804  | 0.161 | 2.971 | 0.005 | 0.294  | 0.004  |
| Cat (e1)                      | 1.075  | 3.423  | 0.084 | 2.298 | 0.035 | 0.000  | 1.274  |
| Dog (e2)                      | 4.091  | 0.011  | 0.078 | 0.025 | 0.544 | 0.051  | 0.293  |
| Horse (e3)                    | 0.087  | 0.335  | 1.479 | 0.359 | 0.016 | 0.326  | 2.221  |
| Cladosporium herbarum (m2)    | 0.074  | 4.100  | 0.014 | 0.018 | 1.067 | 13.063 | 0.454  |
| Aspergillus fumigatus (m3)    | 5.480  | 0.091  | 1.335 | 0.893 | 0.061 | 0.295  | 0.031  |
| Alternaria alternata (m6)     | 0.618  | 0.374  | 2.022 | 0.000 | 0.340 | 0.365  | 1.056  |
| Latex (u85)                   | 11.241 | 1.531  | 0.003 | 0.450 | 0.533 | 2.380  | 0.085  |
| Egg white (f1)                | 1.981  | 13.319 | 0.019 | 0.232 | 0.563 | 0.006  | 0.223  |
| Egg yolk (f75)                | 5.748  | 7.144  | 0.001 | 0.040 | 2.416 | 1.754  | 1.249  |
| Codfish (f3)                  | 2.228  | 0.202  | 1.042 | 1.796 | 1.147 | 11.855 | 0.237  |
| Shrimp/Prawn (f24)            | 0.363  | 1.770  | 0.132 | 1.792 | 0.782 | 3.511  | 0.056  |
| Beef (f27)                    | 3.856  | 4.036  | 1.056 | 1.800 | 3.903 | 0.004  | 8.730  |
| Cow's mik (f2)                | 0.006  | 1.061  | 3.428 | 2.142 | 1.713 | 0.283  | 11.824 |
| Alfa-lactalbumin (f76)        | 2.858  | 4.272  | 1.498 | 5.079 | 0.329 | 7.264  | 4.653  |

|                                                    |        |       |        |        |        |        |        |
|----------------------------------------------------|--------|-------|--------|--------|--------|--------|--------|
| Beta-lactoglobulin (f77)                           | 0.853  | 5.034 | 0.142  | 1.543  | 5.656  | 0.092  | 0.880  |
| Casein (f78 )                                      | 2.193  | 0.257 | 0.420  | 4.163  | 3.245  | 2.178  | 6.716  |
| BSA (e204)                                         | 9.690  | 0.013 | 1.352  | 1.525  | 0.007  | 0.348  | 2.695  |
| Wheat flour (f4)                                   | 0.705  | 2.261 | 0.346  | 2.660  | 5.361  | 3.846  | 0.198  |
| Rice (f9)                                          | 0.255  | 2.249 | 0.267  | 2.897  | 3.464  | 0.256  | 0.383  |
| Sesame (f10)                                       | 1.872  | 0.010 | 0.905  | 0.087  | 8.734  | 1.282  | 1.972  |
| Soybean (f14)                                      | 0.004  | 1.412 | 6.147  | 0.954  | 8.151  | 2.015  | 0.608  |
| Peanut (f13)                                       | 0.341  | 0.019 | 2.969  | 5.555  | 4.041  | 0.001  | 0.118  |
| Hazelnut (f17)                                     | 1.281  | 2.277 | 0.043  | 1.523  | 0.352  | 0.150  | 0.506  |
| Carrot (f31)                                       | 4.877  | 0.025 | 0.464  | 1.009  | 0.254  | 0.533  | 0.002  |
| Potato (f35)                                       | 0.008  | 2.195 | 0.295  | 1.418  | 0.606  | 3.454  | 1.613  |
| Tomato (f25)                                       | 1.350  | 0.292 | 3.249  | 0.239  | 15.350 | 1.993  | 0.063  |
| Apple (f49)                                        | 0.131  | 0.014 | 1.177  | 4.701  | 0.000  | 0.016  | 4.214  |
| Kiwi (f84)                                         | 10.944 | 1.101 | 0.018  | 0.789  | 0.564  | 1.559  | 0.011  |
| Elimination diet (M)                               | 0.491  | 4.372 | 0.417  | 0.003  | 1.154  | 0.337  | 5.873  |
| Gestational diabetes diet (M)                      | 0.452  | 0.224 | 0.120  | 0.183  | 0.850  | 21.015 | 0.493  |
| Cholestatic diet (M)                               | 0.082  | 0.944 | 0.012  | 3.769  | 4.073  | 6.492  | 0.132  |
| Vegan/vegetarian diet (M)                          | 0.170  | 1.228 | 0.690  | 0.717  | 4.931  | 6.086  | 1.550  |
| Other diet                                         | 0.005  | 0.033 | 1.527  | 0.034  | 0.634  | 0.001  | 1.287  |
| Birth method: natural                              | 0.482  | 0.027 | 13.506 | 0.040  | 2.104  | 0.628  | 0.136  |
| Breastfeeding                                      | 5.741  | 2.839 | 17.416 | 5.750  | 2.061  | 0.012  | 4.947  |
| Mixed feeding                                      | 0.944  | 6.060 | 0.883  | 11.270 | 0.275  | 0.145  | 24.014 |
| Formulas                                           | 3.166  | 0.303 | 14.904 | 0.403  | 4.783  | 0.261  | 5.752  |
| Elimination diet (S)                               | 6.438  | 0.469 | 3.765  | 3.738  | 0.061  | 1.080  | 1.345  |
| Chronic diseases (M)                               | 0.222  | 6.094 | 3.249  | 8.144  | 1.498  | 0.253  | 0.113  |
| Chronic diseases ( <i>p</i> )                      | 0.001  | 4.472 | 5.303  | 10.096 | 4.298  | 0.386  | 0.958  |
| Probiotics (M)                                     | 0.713  | 0.579 | 2.278  | 0.114  | 0.812  | 0.167  | 0.189  |
| Probiotics ( <i>p</i> )                            | 0.006  | 0.899 | 3.801  | 1.185  | 2.575  | 0.054  | 0.015  |
| Variability (%)                                    | 8.8    | 8.0   | 7.7    | 7.3    | 7.0    | 6.7    | 5.3    |
| Cumulative (%) with added (Figure 1 and Figure 2). | 48.4   | 56.4  | 64.0   | 71.4   | 78.3   | 85.0   | 90.3   |

**Appendix A7-** The significance of associations in clusters in neural network map with grouping variable IgG

**Table S7.** Cluster description of multivariate analysis with (ESOM maps) IgG level as a grouping variable in allergy profile associated to gestational and early life dietary behavior.

| Cluster | Immunological parameters                                                                                                                                                                                                                                         | Dieting and other variables                                              | <i>r</i> values that are different from 0 with a significance level $\alpha = 0.05$ |
|---------|------------------------------------------------------------------------------------------------------------------------------------------------------------------------------------------------------------------------------------------------------------------|--------------------------------------------------------------------------|-------------------------------------------------------------------------------------|
| a       | low level (cl. 1–2) of specific E antibodies to egg, low to moderate level (cl. 2–4) to potato, moderate (cl. 3–4) to cow's milk and its' particular proteins ( $\alpha$ -La, $\beta$ -Lg, BSA), moderate total IgG (10–20 g/L), high level of IL-2/IFN $\gamma$ | maternal gestational diabetic diet and used probiotics during pregnancy. | 0.465                                                                               |



|   |                                                                                                                                                                                                                                                                                                                                       |                                                                                                                                            |       |
|---|---------------------------------------------------------------------------------------------------------------------------------------------------------------------------------------------------------------------------------------------------------------------------------------------------------------------------------------|--------------------------------------------------------------------------------------------------------------------------------------------|-------|
| b | healthy individuals and allergic subjects with low (cl. 1–2) level of antibodies to cow's milk and carrot, moderate (cl. 3–4) to apple, and high (cl. 4–5) to latex and citrus. All subjects (allergic and controls) had high level of total G antibodies (> 20 g/L), medium levels of IL-2/IFN $\gamma$                              | subjects on mixed and infant formula feeding type, revealed overweight BMI status and supplemented with probiotics                         | 0.377 |
| c | low (cl. 1–2) levels of anti $\beta$ -Lg antibodies, medium (cl. 2–4) to apple, birch, wheat flour, and high to egg proteins and nuts (cl. 4–6), high total IgG (> 20 g/L) and IL-2/IFN $\gamma$                                                                                                                                      | maternal gestational diabetic and cholestatic diets                                                                                        | 0.506 |
| d | low (cl. 1–2) level of antibodies to cat and dog dander, medium (cl. 3–4) to potato, rice, dust mites and to eggs and high to peanut and soybean (cl. 4–5), high level of cytokines IL-4/IL-8/IFN $\gamma$ and total G antibodies (> 20 g/L)                                                                                          | maternal gestational cholestatic / vegetarian diets and supplemented with probiotics during pregnancy.                                     | 0.412 |
| e | moderate (cl. 3–4) level of antibodies to cow's milk and carrot, dust mite and beef, high levels of IL-4/IL-8/IFN $\gamma$ but moderate total IgG (10–20 g/L)                                                                                                                                                                         | subjects were mixed and breastfeed, took probiotics, revealed underweight BMI status, and their mothers were on gestational diabetic diet. | 0.249 |
| f | healthy individuals and allergic subjects with low (cl. 1–2) level of antibodies to potato, apple, rice, medium (cl. 3–4) to molds and pollen and high (cl. 5–6) to cat and dog dander. All subjects (allergic and controls) had increased levels of IL-2/IL-4/IL-8/IFN $\gamma$ but moderate level of total G antibodies (10–20 g/L) | maternal vegetarian diets during pregnancy                                                                                                 | 0.356 |
| g | healthy individuals and allergic subjects with medium (cl. 3–4) level of antibodies to molds, pollen and dust mites and high (cl. 4–5) to casein and cow's milk. All subjects characterized low to moderate total G antibodies (< 10 g/L) and cytokines level.                                                                        | maternal standard or elimination diet                                                                                                      | 0.390 |

**Appendix A8-** The significance of associations in clusters in multivariate analysis with grouping variable IgE

**Table S8.** Cluster description of multivariate analysis (PCA) IgE level as a grouping variable in allergy profile associated to gestational and early life dietary behavior.

| Cluster | Immunological parameters                                                                                                                                                                                                          | Dieting and other variables                                                                                                                                              | <i>r</i> values that are different from 0 with a significance level $\alpha = 0.05$ |
|---------|-----------------------------------------------------------------------------------------------------------------------------------------------------------------------------------------------------------------------------------|--------------------------------------------------------------------------------------------------------------------------------------------------------------------------|-------------------------------------------------------------------------------------|
| I       | low to moderate total IgE and low IgG content and cytokines                                                                                                                                                                       | subjects on mixed feeding type, supplemented with probiotics, whose mothers followed standard diet                                                                       | 0.306                                                                               |
| II      | high total IgE, moderate IgG, low (cl. 1–2) antibodies to eggs, moderate (cl.3–4) content of the antibodies to carrot, apple, soybean and high (cl.5–6) to nuts, pollen and dander and dust mites, with high content of cytokines | subjects supplemented with probiotics, high ratio of male cases, whose mothers followed vegan/vegetarian and elimination diet and took probiotics,                       | 0.603                                                                               |
| III     | high total IgE, moderate total IgG, medium (cl. 2–3) level of antibodies to tomato, sesame, cows' milk proteins and high (cl. 4–5) to sesame, very high levels of IFN $\gamma$ , IL4 and IL-8                                     | subjects on mixed and infant formula feeding type, following elimination diet, whose mothers followed gestational diabetic diet, subjects revealed overweight BMI status | 0.361                                                                               |
| IV      | high total IgE, moderate total IgG, medium to high content (cl. 3–5) of antibodies to cows' milk, eggs and wheat                                                                                                                  | subjects mostly female, whose mothers followed gestational diabetic/cholestatic diet                                                                                     | 0.293                                                                               |

**Appendix A9.** The significance of associations in clusters in neural network map with grouping variable IgE.

**Table S9.** Cluster description of multivariate analysis (ESOM maps) with IgE level as a grouping variable in allergy profile associated to gestational and early life dietary behavior.

| Cluster | Immunological parameters                                                                                                                      | Dieting and other variables                                                                                                                                                                                                                       | <i>r</i> values that are different from 0 with a significance level $\alpha = 0.05$ |
|---------|-----------------------------------------------------------------------------------------------------------------------------------------------|---------------------------------------------------------------------------------------------------------------------------------------------------------------------------------------------------------------------------------------------------|-------------------------------------------------------------------------------------|
| A       | low or no specific antibodies in serum, (cl. 1–2) to dust mites, potato, wheat flour, low IgG but high total IgE, IL-4, IL-8 and IFN $\gamma$ | subjects with allergy symptoms, on elimination diet and using pharmacotherapy, born by caesarean section, infant formula fed, without a positive family history but also whose mothers were on standard diet and took probiotics during pregnancy | 0.496                                                                               |

|   |                                                                                                                                                                                                                              |                                                                                                                                                                                                                                                                                                                                                                                                                  |       |
|---|------------------------------------------------------------------------------------------------------------------------------------------------------------------------------------------------------------------------------|------------------------------------------------------------------------------------------------------------------------------------------------------------------------------------------------------------------------------------------------------------------------------------------------------------------------------------------------------------------------------------------------------------------|-------|
| B | healthy individuals with normal antibodies and cytokines levels                                                                                                                                                              | subjects with no positive allergy history and symptoms, naturally born, mixed and breastfed, and whose mothers were on standard diet and took probiotics during pregnancy                                                                                                                                                                                                                                        | 0.314 |
| C | low (cl. 1–2) level of antibodies to molds and rice, moderate (cl. 3–4) to nuts, soybean and high (cl. 5–6) to dander and pollen, with moderate IgG (10–20 g/l) and high total IgE and both IL-2 and IL-4                    | subjects remaining on an elimination diet for various food allergens like nuts, soybean but also milk, pharmacologically treated and indicating the co-occurrence of other diseases <i>e.g.</i> diabetes and hypothyroidism without a confirmed family history of allergy, mostly female, naturally born, breastfed and taking probiotics in infancy, whose mothers were on elimination diet and took probiotics | 0.501 |
| D | low (cl. 1–2) level of antibodies to tomato, carrot, apple and moderate to high (cl. 3–5) levels of antibodies to grass and birch pollen, mites. They had moderate IgG (10–20 g/l) and high total IgE and both IL-2 and IL-4 | subjects on an elimination diet (S) for various food allergens but consuming milk, mostly male, indicated the co-occurrence of other diseases but negative family history of allergy, revealed underweight BMI status. Childbirth was natural and children were breastfed during infancy. Mothers took probiotics during pregnancy and were on gestational diabetic diet                                         | 0.289 |
| E | moderate (cl. 3–4) level of antibodies to nuts, soybean, rice, tomato and high (cl. 5–6) to dander, mites and pollen, with moderate IgG (10–20 g/l) and high total IgE and all tested cytokines                              | subjects pharmacologically treated, with overweight BMI status, born by caesarean section, breastfed and taking probiotics in infancy, whose mothers were on elimination diet and took probiotics                                                                                                                                                                                                                | 0.315 |
| F | healthy individuals with normal antibodies and cytokines levels                                                                                                                                                              | subjects with no positive allergy history and symptoms, naturally born but infant formula fed, whose mothers were on standard diet                                                                                                                                                                                                                                                                               | 0.366 |
| G | low (cl. 1–2) level of antibodies to cow's milk proteins and rice and low IgG antibodies and cytokines levels                                                                                                                | subjects with positive family history of allergy, revealed underweight BMI status, staying on elimination diet, pharmacologically treated, born naturally                                                                                                                                                                                                                                                        | 0.428 |

|   |                                                                                                                                                                                                                                                        |                                                                                                                                                                                                                                                                                                             |       |
|---|--------------------------------------------------------------------------------------------------------------------------------------------------------------------------------------------------------------------------------------------------------|-------------------------------------------------------------------------------------------------------------------------------------------------------------------------------------------------------------------------------------------------------------------------------------------------------------|-------|
|   |                                                                                                                                                                                                                                                        | and fed a mixed diet, whose mothers eliminated milk                                                                                                                                                                                                                                                         |       |
| H | with no specific IgE antibodies found in serum, with low IgG but high total IgE, IL-4 and IFN $\gamma$                                                                                                                                                 | subjects without manifestation of allergy, staying on dairy and gluten-free diet. Mostly female subjects, fed with infant formulas and used probiotics and nutrients, whose mothers followed gestational diabetic diet                                                                                      | 0.346 |
| I | low (cl. 1–2) level of antibodies to potato, wheat flour, dust mites, with low IgG and moderate IgE, IL-4, IL-8 and IFN $\gamma$                                                                                                                       | subjects with allergy symptoms, on elimination wheat diet or pharmacotherapy, with positive allergic family history, naturally born, breastfeed, whose mothers were on standard diet during pregnancy                                                                                                       | 0.272 |
| J | low (cl. 1–2) level of antibodies to milk proteins and eggs, moderate (cl. 3) to carrot, apple and high (cl. 4–5) levels of antibodies to birch pollen, dander and nuts, with moderate IgG (10–20 g/l) and high total IgE and both IL-2 and IL-4       | subjects on an elimination diet for various food allergens, revealed underweight BMI status, mostly female, indicate the co-occurrence of other diseases but negative family history of allergy. Born by caesarean section and infant formula fed in infancy. The mothers were on gestational diabetic diet | 0.297 |
| K | low (cl. 1–2) level of antibodies to milk proteins and tomato, moderate (cl. 3) to beef, soybean, and peanut and high (cl. 4–5) levels of antibodies to grass, birch pollen, molds, eggs and hazelnuts, with low IgG and high total IgE and IL-4       | subjects with allergy symptoms, using pharmacotherapy, mostly male, without a positive family history, naturally born, breastfeed, suffering from other chronic diseases but also whose mothers were on vegan/vegetarian diet during pregnancy                                                              | 0.215 |
| L | low (cl. 1–2) level of antibodies to tomato and molds, moderate (cl. 3) to beef, soybean, and peanut and high (cl. 4–5) levels of antibodies to grass, birch pollen, molds and hazelnuts, with low IgG but high total IgE, IL-4, IL-8 and IFN $\gamma$ | subjects with allergy symptoms, on an elimination diet for various food allergens, mostly female, without a positive family history, naturally born, breastfeed, suffering from other chronic diseases but also whose mothers were on vegan/vegetarian diet and took probiotics during pregnancy            | 0.291 |

|   |                                                                                                                                                                                         |                                                                                                                                                                                                                                                                    |       |
|---|-----------------------------------------------------------------------------------------------------------------------------------------------------------------------------------------|--------------------------------------------------------------------------------------------------------------------------------------------------------------------------------------------------------------------------------------------------------------------|-------|
| M | low (cl. 1–2) level of antibodies to dust mites, BSA, beef and potato, high (cl. 4–6) to pollen, wheat flour and hazelnut, with low IgG but high total IgE, IL-4, IL-8 and IFN $\gamma$ | subjects with allergy symptoms, on elimination diet but not pharmacotherapy, with negative family history, born by caesarean section and formula or mixed fed, whose mothers took probiotics during pregnancy and stayed on gestational cholestatic diet           | 0.192 |
| N | low or no specific IgE antibodies in serum, (cl. 1–2) to dust mites, beef and potato, with moderate IgG (10–20 g/l) and low total IgE and all tested cytokines                          | subjects pharmacologically treated, on elimination diet, with positive family history, with overweight BMI status, naturally born, breastfed and taking probiotics in infancy, whose mothers were on gestational cholestatic and diabetic diet and took probiotics | 0.269 |
| O | high (cl. 5–6) level of antibodies to milk, dander, nuts, soybean and pollen, with high IgG (>20 g/l) and high total IgE and all tested cytokines                                       | subjects with positive allergy history and severe symptoms, naturally born, breastfed, whose mothers were on gestational cholestatic diet and took probiotics                                                                                                      | 0.213 |
| P | moderate (cl. 2–4) level of antibodies to milk ( $\beta$ -Lg and BSA) and beef proteins, and moderate (cl. 3–4) to eggs with moderate (10–20 g/L) IgG but high total IgE and IL-4       | subjects with positive allergy history, naturally born infant formula fed, on elimination diet and pharmacologically treated, whose mothers were on vegan/vegetarian diet and took probiotics                                                                      | 0.229 |
| Q | moderate (cl. 2–4) level of antibodies to milk (casein) and soybean proteins, and high (cl. 5–6) to nuts and mites with moderate (10–20 g/L) IgG but high total IgE, IL-4 and IL-8      | subjects with positive allergy history, naturally born infant formula fed, on elimination diet and pharmacologically treated, whose mothers were on gestational cholestatic diet and took probiotics                                                               | 0,236 |
| R | healthy individuals with normal antibodies levels but high IL-4 and IL-8                                                                                                                | with negative family history, born by caesarean section and were formula or mixed fed, whose mothers were vegan/vegetarian diet during pregnancy                                                                                                                   | 0.248 |
| S | high (cl. 5–6) to pollen, mites, nuts and dander, with low IgG but high total IgE, IL-4 and IL-8                                                                                        | subjects with allergy symptoms but untreated, with negative family history of allergy, born naturally and breastfed,                                                                                                                                               | 0.260 |

---

whose mothers took probiotics during  
pregnancy and eliminated milk

---
